# Supplementary material for: Energy Assessment of Second-Generation (2G) Bioethanol Production from Sweet Sorghum (Sorghum bicolor (L.) Moench) Bagasse
Source: MDPI journal article supplement (doi:10.3390/agronomy12123106), 2022-12-07
Supplement: s1 [file s1]

**Table S1.** Analysis of variance (ANOVA) of the cellulose (determined as glucan) in the solid phase of the hydrothermal pretreatment.

| VS          | df | Cellulose |        |       |                 |
|-------------|----|-----------|--------|-------|-----------------|
|             |    | SS        | MS     | F     | <i>p</i> -value |
| Model       | 9  | 290.77    | 32.31  | 10.32 | 0.01            |
| Lineal      | 3  | 263.45    | 87.82  | 28.05 | 0.00            |
| T           | 1  | 224.53    | 224.53 | 71.72 | 0.00            |
| t           | 1  | 22.75     | 22.75  | 7.27  | 0.03            |
| S           | 1  | 16.16     | 16.16  | 5.16  | 0.04            |
| Quadratic   | 3  | 3.70      | 1.23   | 0.39  | 0.76            |
| TxT         | 1  | 0.66      | 0.66   | 0.21  | 0.67            |
| txt         | 1  | 0.34      | 0.34   | 0.11  | 0.76            |
| SxS         | 1  | 3.08      | 3.08   | 0.98  | 0.37            |
| Interaction | 3  | 23.62     | 7.87   | 2.51  | 0.17            |
| T x t       | 1  | 1.46      | 1.46   | 0.47  | 0.53            |
| T x S       | 1  | 21.39     | 21.39  | 6.83  | 0.04            |
| t x S       | 1  | 0.77      | 0.77   | 0.25  | 0.64            |
| Error       | 5  | 15.65     | 3.13   |       |                 |
| Total       | 14 | 306.42    |        |       |                 |

VS = variation source; df = degrees of freedom; SS = sum of squares; MS = mean square; T = reaction temperature (°C); t = retention time (min); S = particle size (mm).

**Table S2.** Correlation between the experimental variables of the process.

|                                    | <b>[log(<i>R<sub>o</sub></i>)]</b> | <b>T</b> | <b>t</b> | <b>S</b> | <b>P</b> | <b>HTR</b> | <b>pH</b> | <b>G</b> | <b>H</b> | <b>L</b> | <b>EC</b> | <b>η<sub>T</sub></b> |
|------------------------------------|------------------------------------|----------|----------|----------|----------|------------|-----------|----------|----------|----------|-----------|----------------------|
| <b>[log(<i>R<sub>o</sub></i>)]</b> | 1.00                               |          |          |          |          |            |           |          |          |          |           |                      |
| <b>T</b>                           | 0.91                               | 1.00     |          |          |          |            |           |          |          |          |           |                      |
| <b>t</b>                           | 0.41                               | 0.00     | 1.00     |          |          |            |           |          |          |          |           |                      |
| <b>S</b>                           | -0.19                              | 0.00     | 0.00     | 1.00     |          |            |           |          |          |          |           |                      |
| <b>P</b>                           | 0.32                               | 0.98     | 0.00     | 0.00     | 1.00     |            |           |          |          |          |           |                      |
| <b>HTR</b>                         | -0.38                              | 0.50     | 0.21     | 0.58     | -0.59    | 1.00       |           |          |          |          |           |                      |
| <b>pH</b>                          | -0.92                              | -0.47    | -0.75    | 0.16     | -0.40    | 0.27       | 1.00      |          |          |          |           |                      |
| <b>G</b>                           | 0.56                               | 0.86     | 0.30     | -0.19    | 0.86     | -0.46      | -0.56     | 1.00     |          |          |           |                      |
| <b>H</b>                           | -0.66                              | -0.84    | -0.43    | -0.15    | -0.84    | 0.33       | 0.65      | -0.84    | 1.00     |          |           |                      |
| <b>L</b>                           | 0.75                               | 0.62     | 0.60     | -0.11    | 0.57     | 10.1       | -0.78     | 0.75     | -0.71    | 1.00     |           |                      |
| <b>EC</b>                          | 0.97                               | 0.89     | 0.41     | -0.17    | 0.42     | -0.34      | -0.88     | 0.65     | -0.72    | 0.80     | 1.00      |                      |
| <b>η<sub>T</sub></b>               | -0.12                              | -0.34    | 0.46     | -0.39    | 0.47     | -0.49      | 0.06      | 0.40     | -0.36    | -0.14    | -0.61     | 1.00                 |
| <b>DS</b>                          | 0.50                               | 0.41     | 0.42     | -0.13    | 0.33     | -0.44      | 0.41      | -0.57    | 0.41     | 0.44     | 0.22      | 0.23                 |

[log(*R<sub>o</sub>*)] = severity factor; T = reaction temperature (°C); t = retention time (min); S = particle size (mm); P = pressure (MPa); HTR = heating rate (°C/min); G = glucose (g/L); H = hemicellulose (g/L); L = Lignin (g/L); EC = energy consumed (MJ/g); η<sub>T</sub> = energy productivity (g<sub>sugars</sub>/MJ); DS = dissolution (%).

**Table S3.** Analysis of variance (ANOVA) for glucose release during enzymatic hydrolysis

| <b>VS</b>  | <b>df</b> | <b>SS</b> | <b>MS</b> | <b>F</b> | <b><i>p</i>-value</b> |
|------------|-----------|-----------|-----------|----------|-----------------------|
| Time       | 3         | 29.11     | 9.70      | 91.81    | 0.00                  |
| CEZ        | 1         | 0.40      | 0.39      | 3.74     | 0.07                  |
| Time x CEZ | 3         | 1.55      | 0.52      | 7.97     | 0.00                  |
| Error      | 16        | 11.51     | 0.72      |          |                       |
| Total      | 23        | 31.51     |           |          |                       |

VS = variation source; df = degrees of freedom; SS = sum of squares; MS = mean square; CEZ = enzyme load (FPU/g glucan).
