# Supplementary figures and images for: Energy Assessment of Second-Generation (2G) Bioethanol Production from Sweet Sorghum (Sorghum bicolor (L.) Moench) Bagasse
Source: MDPI journal article supplement (doi:10.3390/agronomy12123106), 2022-12-07

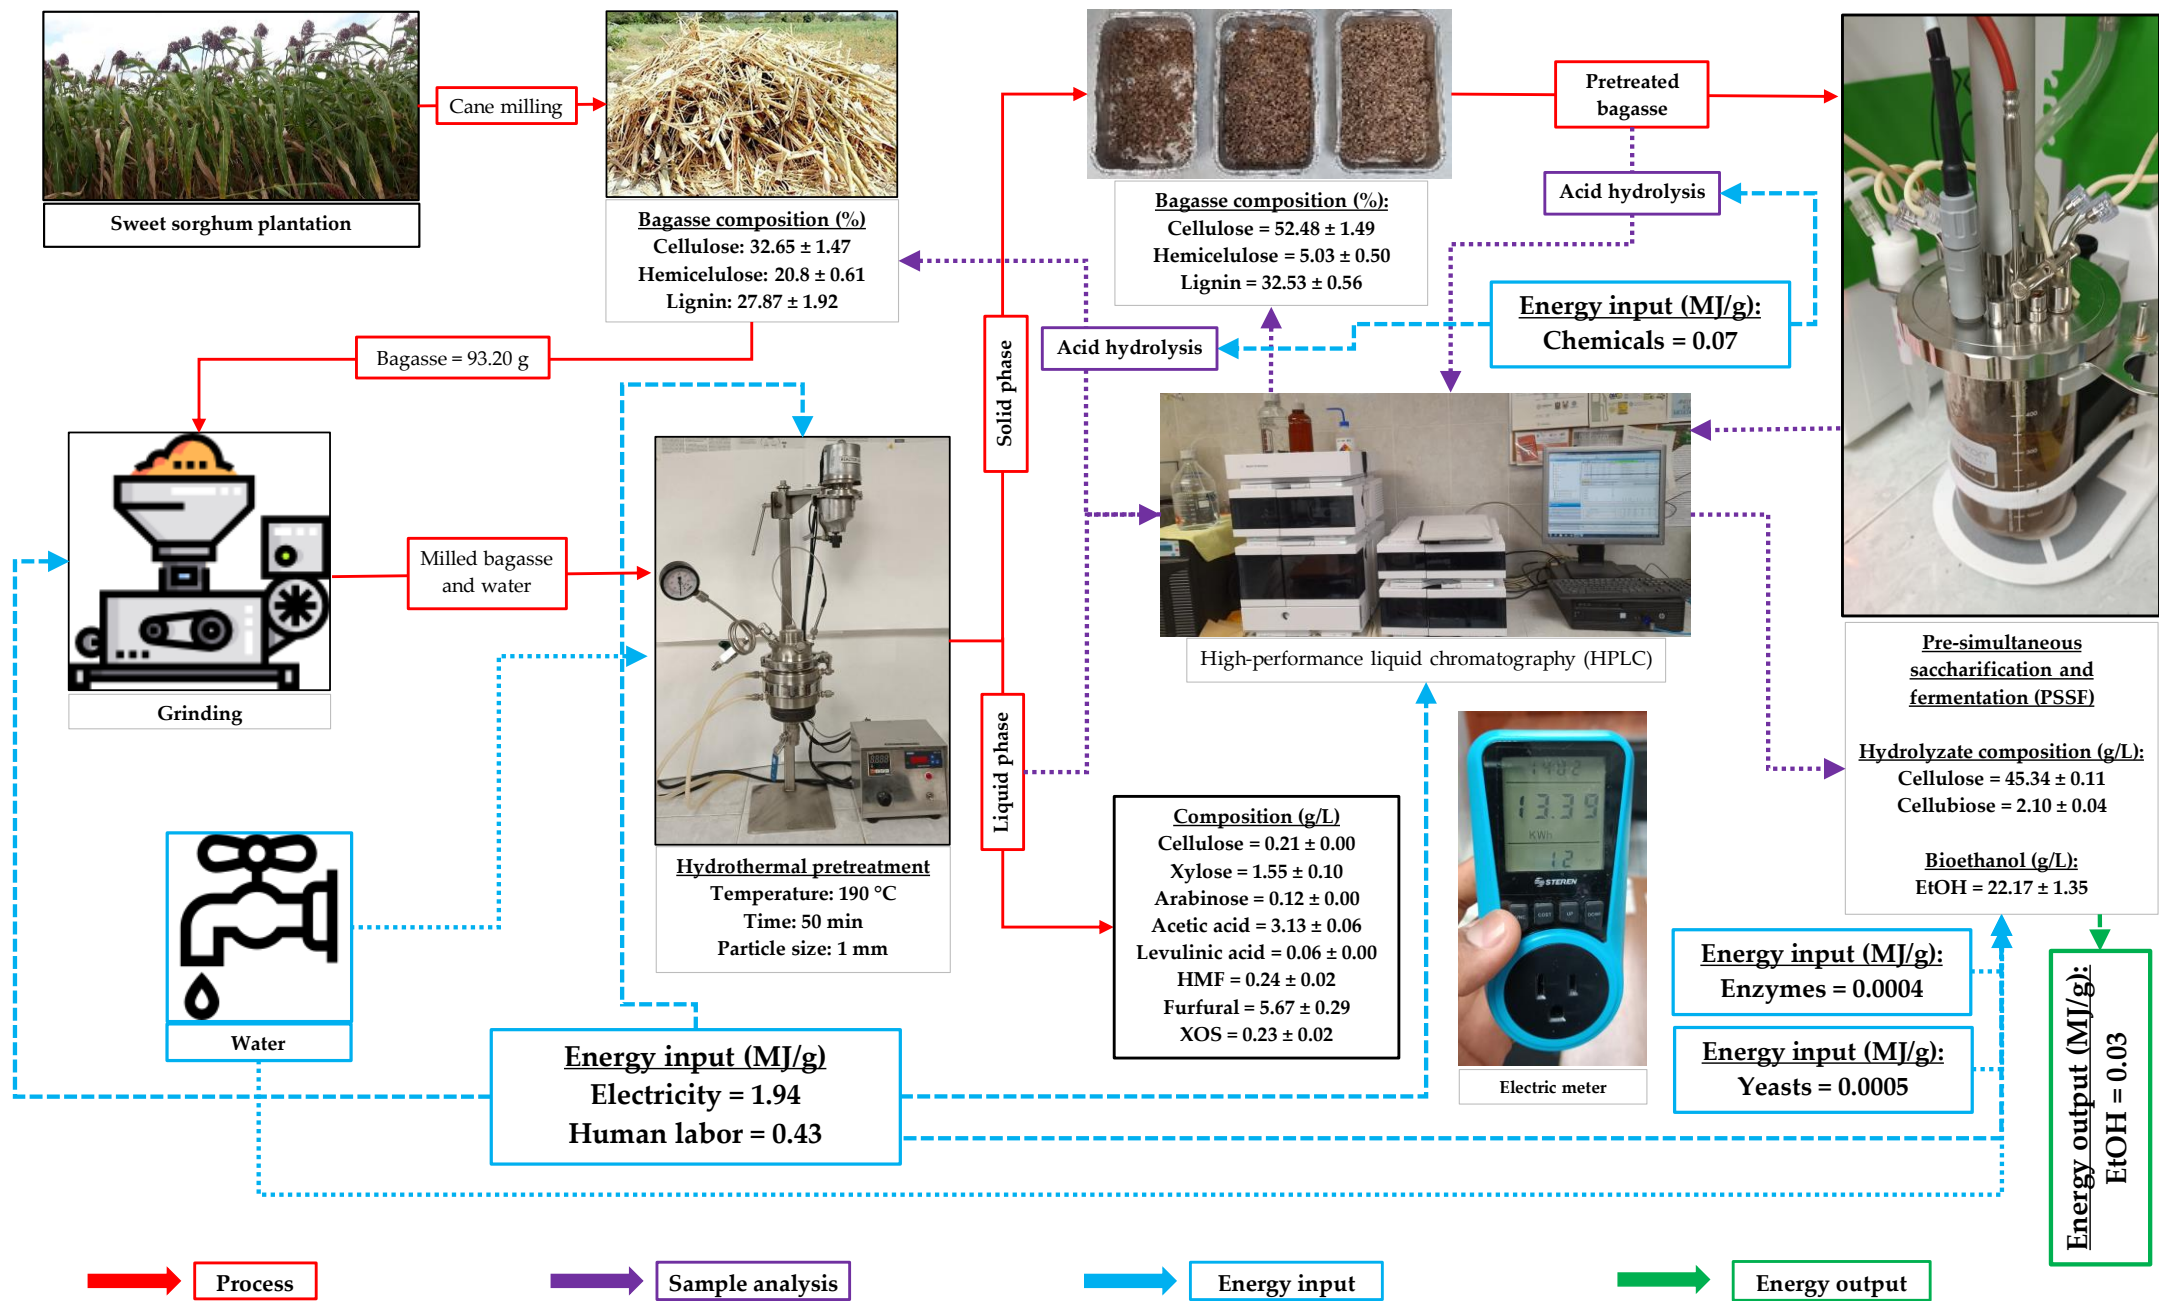

Figure S1. Diagram of the process for obtaining bioethanol.

Supplement: s1 [file s1]

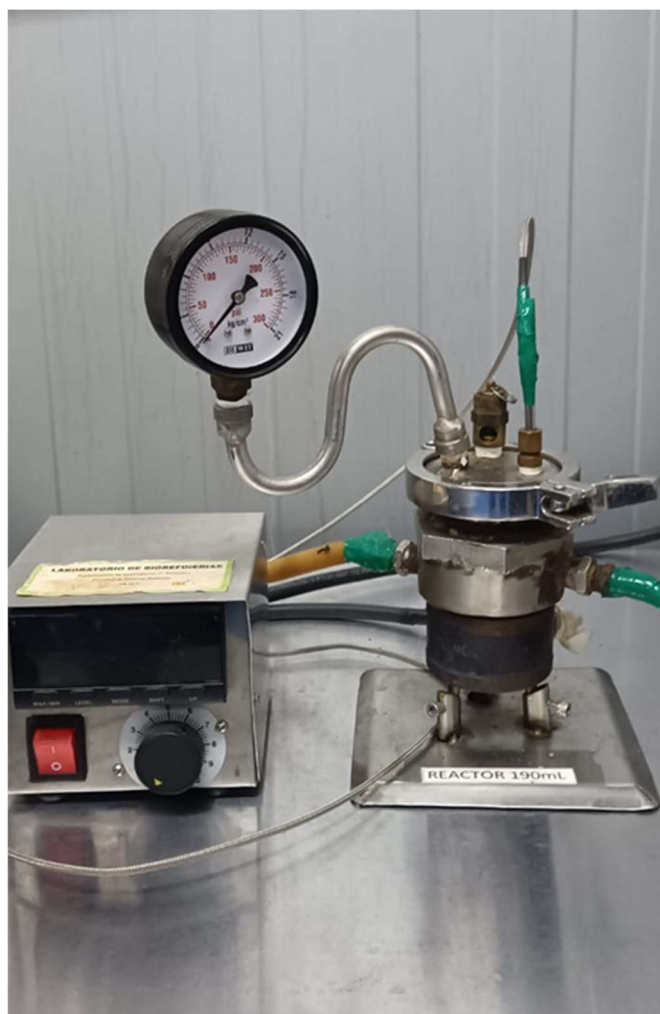

**Figure S2.** Stainless steel pressurized batch reactor with total volume of 0.190 L.

Supplement: s1 [file s1]
